# Supplementary material for: Influenza Virus-Induced Paracrine Cellular Senescence of the Lung Contributes to Enhanced Viral Load
Source: PubMed Central journal article supplement (PMC10389813; doi:10.14336/ad.2023.0310), 2023-08-01
Supplement: AD-14-4-1331-s.pdf [file AD-14-4-1331-s.pdf]

SUPPLEMENTARY DATA

# **Influenza Virus-Induced Paracrine Cellular Senescence of the Lung Contributes to Enhanced Viral Load**

**Luise Schulz, Franziska Hornung, Antje Häder, Lukáš Radosa, Axel A Brakhage, Bettina Löffler<sup>1</sup>, Stefanie Deinhardt-Emmer**

# SUPPLEMENTARY DATA

| A                    |                                                                                                                        |         | B          |            |        |
|----------------------|------------------------------------------------------------------------------------------------------------------------|---------|------------|------------|--------|
| CATEGORY             | OBSERVATION                                                                                                            | GRADING | ID         | CONDITION  | PFU/ML |
| BODYWEIGHT           | Not affected                                                                                                           | 0       | 991        | IAV 21 dpi | 0      |
|                      | Reduction of 5 – 10 %                                                                                                  | 5       | 992        | IAV 21 dpi | 0      |
|                      | Reduction of > 10 %                                                                                                    | 10      | 993        | IAV 21 dpi | 0      |
|                      | Reduction of > 15 %                                                                                                    | 15      | 994        | IAV 21 dpi | 0      |
|                      | Reduction of > 20 %, for max. 48 h                                                                                     | 20      | 995        | IAV 21 dpi | 0      |
| GENERAL CONDITION    | Shiny and smooth fur, clean orifices, normal eating and drinking behavior, normal urination and defecation             | 0       | 996        | IAV 21 dpi | 0      |
|                      | Bluff and scrubby fur, dingy eyes, malfunctioning eating and drinking behavior, problems with urination and defecation | 5       | 997        | IAV 21 dpi | 0      |
|                      | Clotted orifices, partially closed eyes, dehydration, abnormal posture                                                 | 10      | 998        | IAV 21 dpi | 0      |
| SPONTANEOUS BEHAVIOR | Closed eyes                                                                                                            | 20      | 999        | IAV 21 dpi | 0      |
|                      | No conspicuous features (calm and attentive, normal social behavior)                                                   | 0       | 1006       | IAV 21 dpi | 0      |
|                      | Slightly different (very calm, limited motor function)                                                                 | 5       | 1007       | IAV 21 dpi | 0      |
| SPONTANEOUS BEHAVIOR | Strongly altered (isolation, expression of pain, stereotypies, problems with coordination)                             | 10      | 1008       | IAV 21 dpi | 0      |
|                      | Automutilation                                                                                                         | 20      | 1014       | IAV 21 dpi | 0      |
|                      |                                                                                                                        |         | 1015       | IAV 21 dpi | 0      |
|                      |                                                                                                                        | 1016    | IAV 21 dpi | 0          |        |
|                      |                                                                                                                        | 1017    | IAV 21 dpi | 0          |        |
|                      |                                                                                                                        | 1018    | IAV 21 dpi | 0          |        |
|                      |                                                                                                                        | 1019    | IAV 21 dpi | 0          |        |

**Supplementary Figure 1.** (A) IAV infection was performed in BALB/c mice for 21 d. Scoring system to evaluate the health of mice. (B) Virus particles determined using standard plaque assay of lung homogenates were not detectable on day 21 (N = 18).

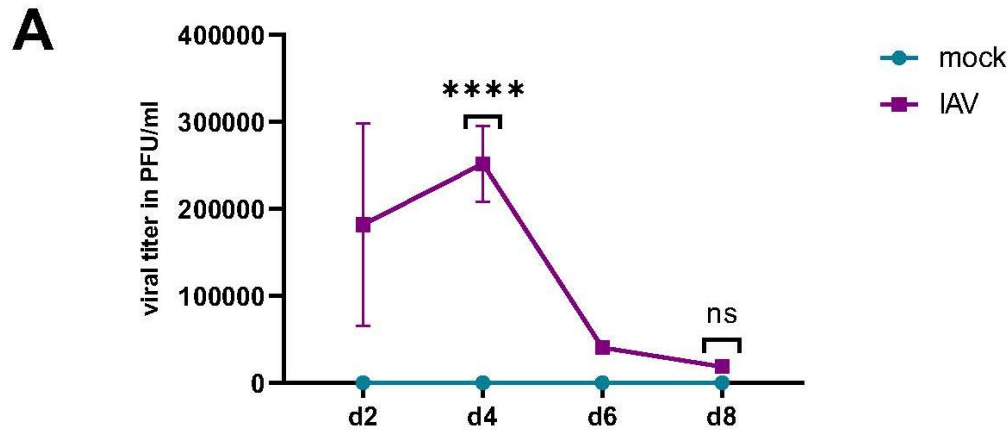

**Supplementary Figure 2.** (A) Ex vivo lung slices were infected with IAV for 8 d. Active virus particles determined with standard plaque assay were increased on day 4 (N = 4). Significance was calculated with Two-way ANOVA (ns p > 0.05; \*\*\*\* p ≤ 0.0001).

# SUPPLEMENTARY DATA

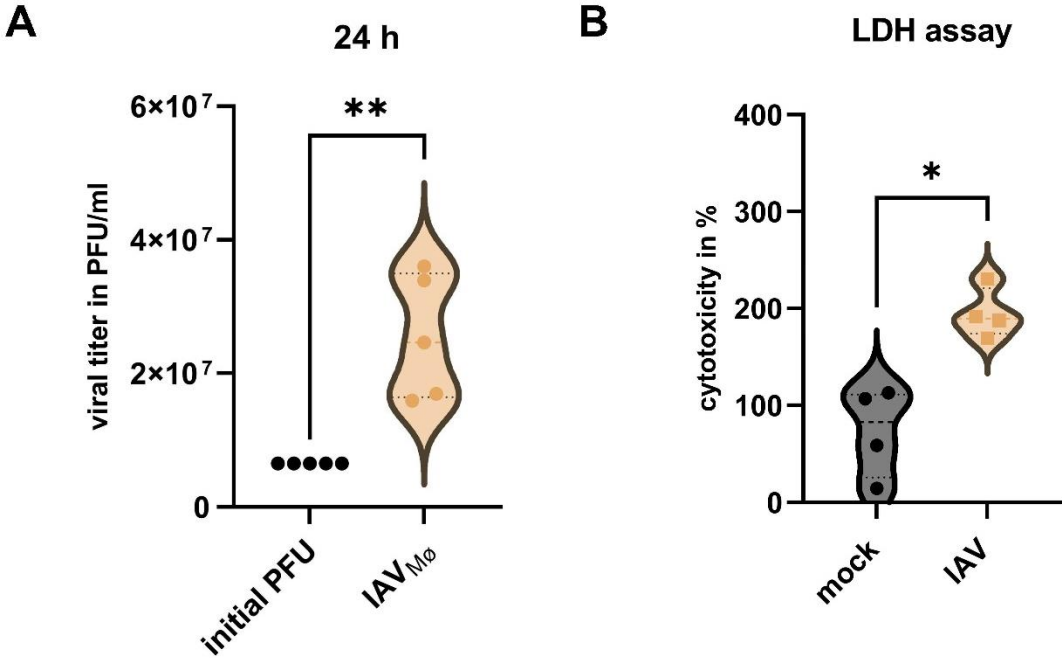

**Supplementary Figure 3.** (A) HMDM were infected with IAV for 24 h. Viral titer detected by standard plaque assay is significantly higher compared with the initial PFU (N = 5). Significance was calculated with the Mann-Whitney U test (\*\* p ≤ 0.01). (B) The infected hMDM showed significantly higher cell cytotoxicity (N = 4). Significance was calculated with the Mann-Whitney U test (\* p ≤ 0.05).

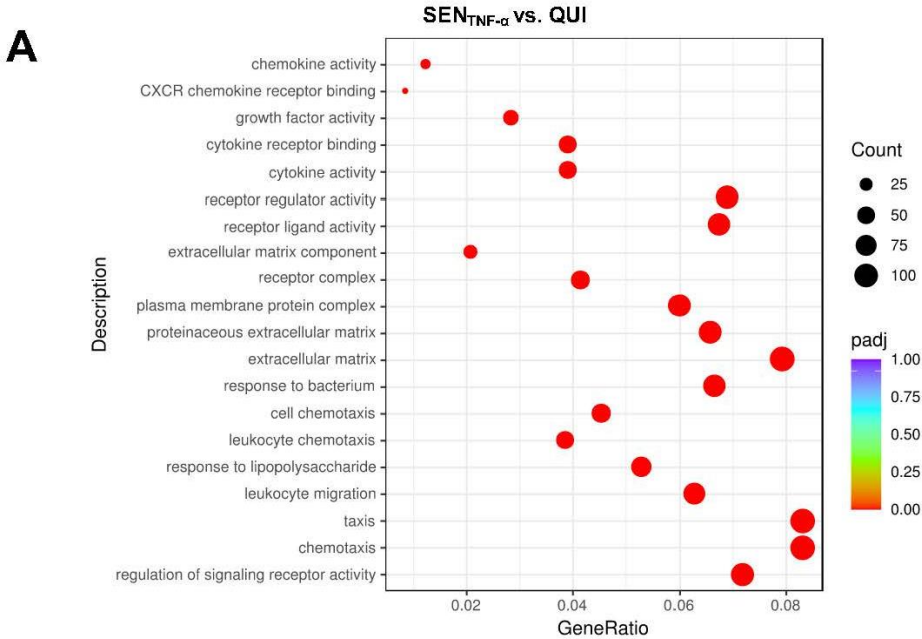

**Supplementary Figure 4.** (A) IMR-90s were treated with TNF-α for 10 d. The GO enrichment analysis of SEN<sub>TNF-α</sub> in comparison to QUI demonstrated significant differences regarding extracellular matrix, chemotaxis, and regulation of signaling receptor activity.

# SUPPLEMENTARY DATA

**A**

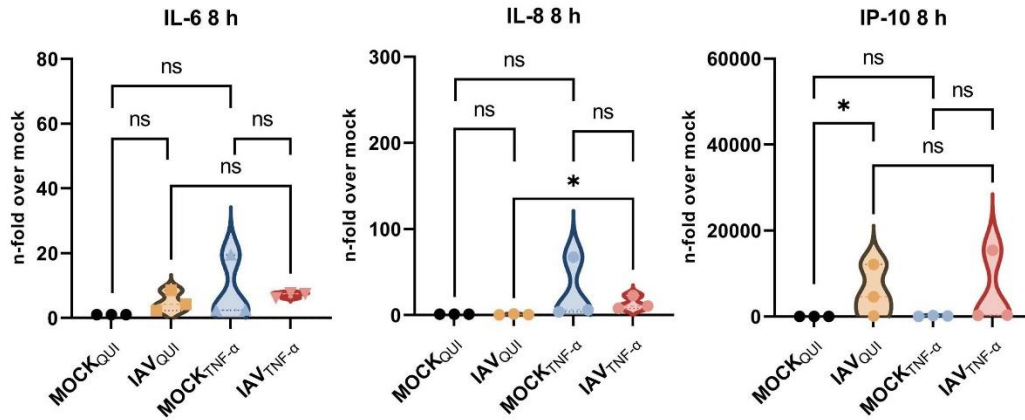

**B**

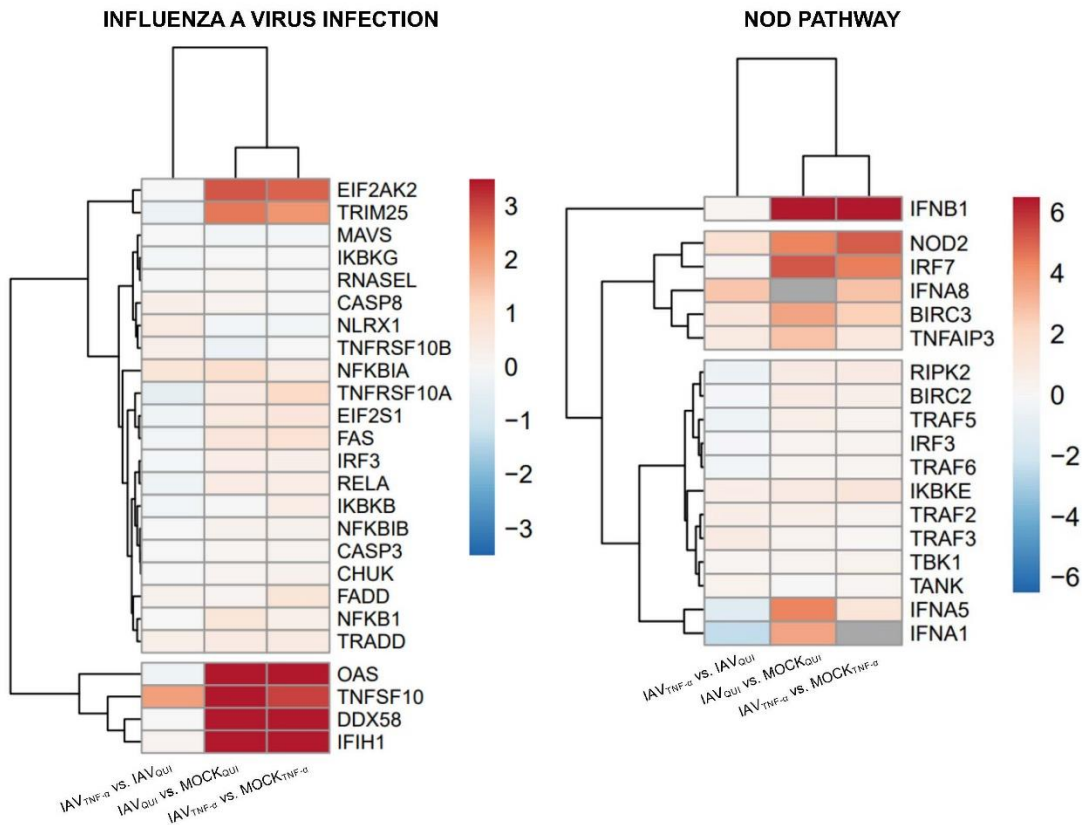

**Supplementary Figure 5.** (A) Senescent IMR-90s (IAV<sub>TNF-α</sub>) were infected with IAV for 8 h and 24 h. The mRNA level of IL-8 was significantly higher in IAV<sub>TNF-α</sub> compared to IAV<sub>QUI</sub> (N = 3). Significance was calculated with One-way ANOVA (ns p > 0.05; \* p ≤ 0.05). (B) Transcriptomic analysis of IAV<sub>TNF-α</sub> and IAV<sub>QUI</sub> after IAV infection. Individually expressed genes of influenza A virus infection and the NOD pathway are demonstrated in heatmaps. Gene expression in heatmaps over log<sub>2</sub>foldchange.

# SUPPLEMENTARY DATA

**Supplementary Table 1.** Transcriptomic analysis of SEN<sub>TNF- $\alpha$</sub>  and SEN<sub>DOXO</sub> after 10 d of senescence induction. The Venn diagram (Figure 4 F) revealed 222 co-regulated genes between SEN<sub>TNF- $\alpha$</sub>  and SEN<sub>DOXO</sub>.

| GENE              | BIOTYPE                            | DESCRIPTION                                                   |
|-------------------|------------------------------------|---------------------------------------------------------------|
| <b>GPR157</b>     | protein coding                     | G protein-coupled receptor 157                                |
| <b>SNORA73B</b>   | snoRNA                             | small nucleolar RNA, H/ACA box 73B                            |
| <b>ZFP69B</b>     | protein coding                     | ZFP69 zinc finger protein B                                   |
| <b>TCTEX1D4</b>   | protein coding                     | Tctex1 domain containing 4                                    |
| <b>LEPR</b>       | protein coding                     | leptin receptor                                               |
| <b>GNG12-AS1</b>  | antisense                          | GNG12 antisense RNA 1                                         |
| <b>MIR186</b>     | miRNA                              | microRNA 186                                                  |
| <b>LRR8C</b>      | protein coding                     | leucine rich repeat containing 8 VRAC subunit C               |
| <b>BTBD8</b>      | protein coding                     | BTB domain containing 8                                       |
| <b>ST7L</b>       | protein coding                     | suppression of tumorigenicity 7 like                          |
| <b>MIR5087</b>    | miRNA                              | microRNA 5087                                                 |
| <b>HIST2H2BC</b>  | transcribed unprocessed pseudogene | histone cluster 2 H2B family member c (pseudogene)            |
| <b>MPZ</b>        | protein coding                     | myelin protein zero                                           |
| <b>TGFB2-AS1</b>  | antisense                          | TGFB2 antisense RNA 1 (head to head)                          |
| <b>AL118511.1</b> | antisense                          | uncharacterized LOC101927604                                  |
| <b>B3GALNT2</b>   | protein coding                     | beta-1,3-N-acetylgalactosaminyltransferase 2                  |
| <b>KCNS3</b>      | protein coding                     | potassium voltage-gated channel modifier subfamily S member 3 |
| <b>RMDN2</b>      | protein coding                     | regulator of microtubule dynamics 2                           |
| <b>AC016727.1</b> | antisense                          | novel transcript, antisense to XPO1                           |
| <b>AC108479.1</b> | processed pseudogene               | WW domain binding protein 1 (WBP1) pseudogene                 |
| <b>NPAS2</b>      | protein coding                     | neuronal PAS domain protein 2                                 |
| <b>AC017074.1</b> | lincRNA                            | novel transcript                                              |
| <b>MBD5</b>       | protein coding                     | methyl-CpG binding domain protein 5                           |
| <b>ZNF804A</b>    | protein coding                     | zinc finger protein 804A                                      |
| <b>AOX1</b>       | protein coding                     | aldehyde oxidase 1                                            |
| <b>PLEKHM3</b>    | protein coding                     | pleckstrin homology domain containing M3                      |
| <b>ACKR3</b>      | protein coding                     | atypical chemokine receptor 3                                 |
| <b>MIR4442</b>    | miRNA                              | microRNA 4442                                                 |
| <b>AC098614.1</b> | transcribed processed pseudogene   | tropomyosin 4 (TPM4) pseudogene                               |
| <b>SUSD5</b>      | protein coding                     | sushi domain containing 5                                     |

## SUPPLEMENTARY DATA

|                   |                                    |                                                                            |
|-------------------|------------------------------------|----------------------------------------------------------------------------|
| <b>LINC00960</b>  | lincRNA                            | long intergenic non-protein coding RNA 960                                 |
| <b>CEP97</b>      | protein coding                     | centrosomal protein 97                                                     |
| <b>QTRT2</b>      | protein coding                     | queuine tRNA-ribosyltransferase accessory subunit 2                        |
| <b>RAB43</b>      | protein coding                     | RAB43, member RAS oncogene family                                          |
| <b>NCEH1</b>      | protein coding                     | neutral cholesterol ester hydrolase 1                                      |
| <b>LPP-AS2</b>    | antisense                          | LPP antisense RNA 2                                                        |
| <b>NRROS</b>      | protein coding                     | negative regulator of reactive oxygen species                              |
| <b>LMLN</b>       | protein coding                     | leishmanolysin like peptidase                                              |
| <b>RELL1</b>      | protein coding                     | RELT like 1                                                                |
| <b>GABRA2</b>     | protein coding                     | gamma-aminobutyric acid type A receptor alpha2 subunit                     |
| <b>LNX1</b>       | protein coding                     | ligand of numb-protein X 1                                                 |
| <b>CEP135</b>     | protein coding                     | centrosomal protein 135                                                    |
| <b>ADGRL3</b>     | protein coding                     | adhesion G protein-coupled receptor L3                                     |
| <b>CXCL10</b>     | protein coding                     | C-X-C motif chemokine ligand 10                                            |
| <b>BMP2K</b>      | protein coding                     | BMP2 inducible kinase                                                      |
| <b>PAQR3</b>      | protein coding                     | progesterin and adipoQ receptor family member 3                            |
| <b>PRKG2</b>      | protein coding                     | protein kinase cGMP-dependent 2                                            |
| <b>HERC6</b>      | protein coding                     | HECT and RLD domain containing E3 ubiquitin protein ligase family member 6 |
| <b>TIFA</b>       | protein coding                     | TRAF interacting protein with forkhead associated domain                   |
| <b>HSPA4L</b>     | protein coding                     | heat shock protein family A (Hsp70) member 4 like                          |
| <b>RPL7AP28</b>   | processed pseudogene               | ribosomal protein L7a pseudogene 28                                        |
| <b>NOCT</b>       | protein coding                     | nocturnin                                                                  |
| <b>AC093909.1</b> | processed pseudogene               | mitochondrial translational release factor 1-like (MTRF1L) pseudogene      |
| <b>MIR4458HG</b>  | lincRNA                            | MIR4458 host gene                                                          |
| <b>DNAH5</b>      | protein coding                     | dynein axonemal heavy chain 5                                              |
| <b>RBBP4P1</b>    | processed pseudogene               | RB binding protein 4 pseudogene 1                                          |
| <b>GDNF</b>       | protein coding                     | glial cell derived neurotrophic factor                                     |
| <b>GTF2H2B</b>    | transcribed unprocessed pseudogene | general transcription factor IIH subunit 2B (pseudogene)                   |
| <b>ARHGEF28</b>   | protein coding                     | Rho guanine nucleotide exchange factor 28                                  |
| <b>DTWD2</b>      | protein coding                     | DTW domain containing 2                                                    |
| <b>RF02038</b>    | miscellaneous RNA                  |                                                                            |
| <b>MFAP3</b>      | protein coding                     | microfibril associated protein 3                                           |
| <b>CYFIP2</b>     | protein coding                     | cytoplasmic FMR1 interacting protein 2                                     |

## SUPPLEMENTARY DATA

|                    |                                    |                                                        |
|--------------------|------------------------------------|--------------------------------------------------------|
| <b>AC008429.2</b>  | processed pseudogene               | pyrophosphatase (inorganic) 1 (PPA1) pseudogene        |
| <b>EDN1</b>        | protein coding                     | endothelin 1                                           |
| <b>HIST1H2AI</b>   | protein coding                     | histone cluster 1 H2A family member i                  |
| <b>ZSCAN12P1</b>   | transcribed unprocessed pseudogene | zinc finger and SCAN domain containing 12 pseudogene 1 |
| <b>UHRF1BP1</b>    | protein coding                     | UHRF1 binding protein 1                                |
| <b>USP45</b>       | protein coding                     | ubiquitin specific peptidase 45                        |
| <b>PRDM1</b>       | protein coding                     | PR/SET domain 1                                        |
| <b>MFSD4B</b>      | protein coding                     | major facilitator superfamily domain containing 4B     |
| <b>RNA5SP219</b>   | rRNA pseudogene                    | RNA, 5S ribosomal pseudogene 219                       |
| <b>ULBP2</b>       | protein coding                     | UL16 binding protein 2                                 |
| <b>ULBP1</b>       | protein coding                     | UL16 binding protein 1                                 |
| <b>ULBP3</b>       | protein coding                     | UL16 binding protein 3                                 |
| <b>IL6</b>         | protein coding                     | interleukin 6                                          |
| <b>GTF2IP23</b>    | unprocessed pseudogene             | general transcription factor Iii pseudogene 23         |
| <b>MIR590</b>      | miRNA                              | microRNA 590                                           |
| <b>RWDD4P1</b>     | processed pseudogene               | RWD domain containing 4 pseudogene 1                   |
| <b>ATXN7L1</b>     | protein coding                     | ataxin 7 like 1                                        |
| <b>WNT16</b>       | protein coding                     | Wnt family member 16                                   |
| <b>AC006148.2</b>  | lincRNA                            | novel transcript                                       |
| <b>AC004930.1</b>  | lincRNA                            | novel transcript                                       |
| <b>BX890604.2</b>  | lincRNA                            | novel transcript                                       |
| <b>MIR4767</b>     | miRNA                              | microRNA 4767                                          |
| <b>TBCAP1</b>      | processed pseudogene               | tubulin folding cofactor A pseudogene 1                |
| <b>MID1IP1-AS1</b> | antisense                          | MID1IP1 antisense RNA 1                                |
| <b>CLCN5</b>       | protein coding                     | chloride voltage-gated channel 5                       |
| <b>MIR6895</b>     | miRNA                              | microRNA 6895                                          |
| <b>PHKA1</b>       | protein coding                     | phosphorylase kinase regulatory subunit alpha 1        |
| <b>RBM41</b>       | protein coding                     | RNA binding motif protein 41                           |
| <b>L1CAM</b>       | protein coding                     | L1 cell adhesion molecule                              |
| <b>TMLHE</b>       | protein coding                     | trimethyllysine hydroxylase, epsilon                   |
| <b>NAT1</b>        | protein coding                     | N-acetyltransferase 1                                  |
| <b>TNFRSF10C</b>   | protein coding                     | TNF receptor superfamily member 10c                    |
| <b>TNFRSF10A</b>   | protein coding                     | TNF receptor superfamily member 10a                    |

## SUPPLEMENTARY DATA

|                   |                                    |                                                      |
|-------------------|------------------------------------|------------------------------------------------------|
| <b>DOCK5</b>      | protein coding                     | dedicator of cytokinesis 5                           |
| <b>AC108449.2</b> | sense intronic                     | novel transcript, sense intronic to HMBOX1           |
| <b>DUSP4</b>      | protein coding                     | dual specificity phosphatase 4                       |
| <b>RAB11FIP1</b>  | protein coding                     | RAB11 family interacting protein 1                   |
| <b>POMK</b>       | protein coding                     | protein-O-mannose kinase                             |
| <b>MYBL1</b>      | protein coding                     | MYB proto-oncogene like 1                            |
| <b>AC087752.3</b> | sense intronic                     | novel transcript                                     |
| <b>C8orf31</b>    | processed transcript               | chromosome 8 open reading frame 31 (putative)        |
| <b>GLIS3</b>      | protein coding                     | GLIS family zinc finger 3                            |
| <b>PRUNE2</b>     | protein coding                     | prune homolog 2                                      |
| <b>TNFSF15</b>    | protein coding                     | TNF superfamily member 15                            |
| <b>ASTN2</b>      | protein coding                     | astrotactin 2                                        |
| <b>AC080023.1</b> | antisense                          | novel transcript                                     |
| <b>SOX6</b>       | protein coding                     | SRY-box 6                                            |
| <b>NCR3LG1</b>    | protein coding                     | natural killer cell cytotoxicity receptor 3 ligand 1 |
| <b>DNAJC24</b>    | protein coding                     | DnaJ heat shock protein family (Hsp40) member C24    |
| <b>AC087276.1</b> | sense overlapping                  | novel transcript, sense overlapping TTC17            |
| <b>PTPRJ</b>      | protein coding                     | protein tyrosine phosphatase, receptor type J        |
| <b>BATF2</b>      | protein coding                     | basic leucine zipper ATF-like transcription factor 2 |
| <b>FAM86C1</b>    | protein coding                     | family with sequence similarity 86 member C1         |
| <b>ALG1L9P</b>    | transcribed unprocessed pseudogene | asparagine-linked glycosylation 1-like 9, pseudogene |
| <b>RNF169</b>     | protein coding                     | ring finger protein 169                              |
| <b>AP003119.2</b> | antisense                          | uncharacterized LOC101928837                         |
| <b>ACER3</b>      | protein coding                     | alkaline ceramidase 3                                |
| <b>CCDC89</b>     | protein coding                     | coiled-coil domain containing 89                     |
| <b>MMP10</b>      | protein coding                     | matrix metalloproteinase 10                          |
| <b>ZC3H12C</b>    | protein coding                     | zinc finger CCCH-type containing 12C                 |
| <b>USP6NL</b>     | protein coding                     | USP6 N-terminal like                                 |
| <b>NAMPTP1</b>    | processed pseudogene               | nicotinamide phosphoribosyltransferase pseudogene 1  |
| <b>PANK1</b>      | protein coding                     | pantothenate kinase 1                                |
| <b>EXOC6</b>      | protein coding                     | exocyst complex component 6                          |
| <b>SLC35G1</b>    | protein coding                     | solute carrier family 35 member G1                   |
| <b>PLEKHA1</b>    | protein coding                     | pleckstrin homology domain containing A1             |
| <b>ADAM12</b>     | protein coding                     | ADAM metalloproteinase domain 12                     |



## SUPPLEMENTARY DATA

|                   |                      |                                                                      |
|-------------------|----------------------|----------------------------------------------------------------------|
| <b>AC010186.3</b> | sense intronic       | novel transcript                                                     |
| <b>EIF2S3B</b>    | protein coding       | eukaryotic translation initiation factor 2 subunit gamma B           |
| <b>FAM234B</b>    | protein coding       | family with sequence similarity 234 member B                         |
| <b>BHLHE41</b>    | protein coding       | basic helix-loop-helix family member e41                             |
| <b>FAR2</b>       | protein coding       | fatty acyl-CoA reductase 2                                           |
| <b>SLC2A13</b>    | protein coding       | solute carrier family 2 member 13                                    |
| <b>AMIGO2</b>     | protein coding       | adhesion molecule with Ig like domain 2]                             |
| <b>SCN8A</b>      | protein coding       | sodium voltage-gated channel alpha subunit 8                         |
| <b>TAC3</b>       | protein coding       | tachykinin 3                                                         |
| <b>RXYLT1</b>     | protein coding       | ribitol xylosyltransferase 1                                         |
| <b>PABPC1P4</b>   | processed pseudogene | poly(A) binding protein cytoplasmic 1 pseudogene 4                   |
| <b>RBMS1P1</b>    | processed pseudogene | RNA binding motif single stranded interacting protein 1 pseudogene 1 |
| <b>SLC35E3</b>    | protein coding       | solute carrier family 35 member E3                                   |
| <b>LINC02407</b>  | lincRNA              | long intergenic non-protein coding RNA 2407                          |
| <b>NAV3</b>       | protein coding       | neuron navigator 3                                                   |
| <b>GIT2</b>       | protein coding       | GIT ArfGAP 2                                                         |
| <b>P2RX7</b>      | protein coding       | purinergic receptor P2X 7                                            |
| <b>MPHOSPH9</b>   | protein coding       | M-phase phosphoprotein 9                                             |
| <b>AL161421.1</b> | antisense            | novel transcript, antisense to FNDC3A                                |
| <b>KLF5</b>       | protein coding       | Kruppel like factor 5                                                |
| <b>SNORA79B</b>   | snoRNA               | small nucleolar RNA, H/ACA box 79B                                   |
| <b>ARHGAP5</b>    | protein coding       | Rho GTPase activating protein 5                                      |
| <b>RALGAPA1</b>   | protein coding       | Ral GTPase activating protein catalytic alpha subunit 1              |
| <b>KLHL28</b>     | protein coding       | kelch like family member 28                                          |
| <b>HIF1A-AS1</b>  | lincRNA              | HIF1A antisense RNA 1                                                |
| <b>COQ6</b>       | protein coding       | coenzyme Q6, monooxygenase                                           |
| <b>ENTPD5</b>     | protein coding       | ectonucleoside triphosphate diphosphohydrolase 5                     |
| <b>AL355102.5</b> | antisense            | novel transcript, antisense to BDKRB2                                |
| <b>MIR377</b>     | miRNA                | microRNA 377                                                         |
| <b>NIPA1</b>      | protein coding       | NIPA magnesium transporter 1                                         |
| <b>PWAR5</b>      | TEC                  | Prader Willi/Angelman region RNA 5                                   |
| <b>AC124312.2</b> | lincRNA              | novel transcript                                                     |
| <b>TTBK2</b>      | protein coding       | tau tubulin kinase 2                                                 |
| <b>TMEM62</b>     | protein coding       | transmembrane protein 62                                             |
| <b>DMXL2</b>      | protein coding       | Dmx like 2                                                           |

## SUPPLEMENTARY DATA

|                   |                                    |                                                                                                |
|-------------------|------------------------------------|------------------------------------------------------------------------------------------------|
| <b>PAQR5</b>      | protein coding                     | progesterin and adipoQ receptor family member 5                                                |
| <b>SYNM</b>       | protein coding                     | synemin                                                                                        |
| <b>MIR5587</b>    | miRNA                              | microRNA 5587                                                                                  |
| <b>AC141586.1</b> | transcribed unprocessed pseudogene | potassium channel tetramerization domain containing 5 pseudogene                               |
| <b>ZNF597</b>     | protein coding                     | zinc finger protein 597                                                                        |
| <b>AC138969.1</b> | unprocessed pseudogene             | polycystic kidney disease 1 (autosomal dominant) (PKD1) pseudogene                             |
| <b>CCP110</b>     | protein coding                     | centriolar coiled-coil protein 110                                                             |
| <b>RAB43P1</b>    | processed pseudogene               | RAB43 pseudogene 1                                                                             |
| <b>ARL2BP</b>     | protein coding                     | ADP ribosylation factor like GTPase 2 binding protein                                          |
| <b>CMTM1</b>      | protein coding                     | CKLF like MARVEL transmembrane domain containing 1                                             |
| <b>NFATC3</b>     | protein coding                     | nuclear factor of activated T cells 3                                                          |
| <b>SLC7A6</b>     | protein coding                     | solute carrier family 7 member 6                                                               |
| <b>TANGO6</b>     | protein coding                     | transport and golgi organization 6 homolog                                                     |
| <b>NUDT7</b>      | protein coding                     | nudix hydrolase 7                                                                              |
| <b>CENPN</b>      | protein coding                     | centromere protein N                                                                           |
| <b>LINC01081</b>  | lincRNA                            | long intergenic non-protein coding RNA 1081                                                    |
| <b>PITPNA-AS1</b> | antisense                          | PITPNA antisense RNA 1                                                                         |
| <b>AC130689.1</b> | processed pseudogene               | succinate dehydrogenase complex, subunit C, integral membrane protein, 15kDa (SDHC) pseudogene |
| <b>ZNF594</b>     | protein coding                     | zinc finger protein 594                                                                        |
| <b>UBE2SP1</b>    | processed pseudogene               | ubiquitin conjugating enzyme E2 S pseudogene 1                                                 |
| <b>RASD1</b>      | protein coding                     | ras related dexamethasone induced 1                                                            |
| <b>TWF1P1</b>     | processed pseudogene               | twinfilin 1 pseudogene 1                                                                       |
| <b>AC060780.2</b> | processed pseudogene               | ribosomal protein, large, P1 (RPLP1) pseudogene                                                |
| <b>TMEM106A</b>   | protein coding                     | transmembrane protein 106A                                                                     |
| <b>AC004596.1</b> | antisense                          | novel transcript, antisense to ATXN7L3                                                         |
| <b>AC068152.1</b> | processed transcript               | novel transcript                                                                               |
| <b>ERN1</b>       | protein coding                     | endoplasmic reticulum to nucleus signaling 1                                                   |
| <b>PLEKHM1P1</b>  | transcribed unprocessed pseudogene | pleckstrin homology and RUN domain containing M1 pseudogene 1                                  |
| <b>SLC16A6</b>    | protein coding                     | solute carrier family 16 member 6                                                              |
| <b>AC132938.3</b> | antisense                          | novel transcript, antisense NARF                                                               |
| <b>TYMSOS</b>     | bidirectional promoter lincRNA     | TYMS opposite strand                                                                           |
| <b>AC090772.3</b> | lincRNA                            | novel transcript                                                                               |
| <b>KCTD1</b>      | protein coding                     | potassium channel tetramerization domain containing 1                                          |

## SUPPLEMENTARY DATA

|                   |                                  |                                                                     |
|-------------------|----------------------------------|---------------------------------------------------------------------|
| <b>GAREM1</b>     | protein coding                   | GRB2 associated regulator of MAPK1 subtype 1                        |
| <b>RAB27B</b>     | protein coding                   | RAB27B, member RAS oncogene family                                  |
| <b>WDR7</b>       | protein coding                   | WD repeat domain 7                                                  |
| <b>AC090409.1</b> | lincRNA                          | novel transcript                                                    |
| <b>RNF152</b>     | protein coding                   | ring finger protein 152                                             |
| <b>PIGN</b>       | protein coding                   | phosphatidylinositol glycan anchor biosynthesis class N             |
| <b>SRXN1</b>      | protein coding                   | sulfiredoxin 1                                                      |
| <b>UBE2D3P1</b>   | processed pseudogene             | ubiquitin conjugating enzyme E2 D3 pseudogene 1                     |
| <b>MCM8</b>       | protein coding                   | minichromosome maintenance 8 homologous recombination repair factor |
| <b>APCDD1L</b>    | protein coding                   | APC down-regulated 1 like                                           |
| <b>ZSWIM4</b>     | protein coding                   | zinc finger SWIM-type containing 4                                  |
| <b>MIR641</b>     | miRNA                            | microRNA 641                                                        |
| <b>ZNF283</b>     | protein coding                   | zinc finger protein 283                                             |
| <b>ZNF155</b>     | protein coding                   | zinc finger protein 155                                             |
| <b>ZNF611</b>     | protein coding                   | zinc finger protein 611                                             |
| <b>ZNF702P</b>    | transcribed processed pseudogene | zinc finger protein 702, pseudogene                                 |
| <b>AC008735.4</b> | antisense                        | novel transcript, antisense to ZNF865                               |
| <b>ZNF543</b>     | protein coding                   | zinc finger protein 543                                             |
| <b>ZNRF3</b>      | protein coding                   | zinc and ring finger 3                                              |
| <b>OSBP2</b>      | protein coding                   | oxysterol binding protein 2                                         |
| <b>CCDC134</b>    | protein coding                   | coiled-coil domain containing 134                                   |
| <b>FP671120.4</b> | lincRNA                          | novel transcript, similar to YY1 associated myogenesis RNA 1 YAM1   |
| <b>MEMO1P1</b>    | processed pseudogene             | mediator of cell motility 1 pseudogene 1                            |
| <b>TRAPPC10</b>   | protein coding                   | trafficking protein particle complex 10                             |

# SUPPLEMENTARY DATA

**Supplementary Table 2.** Listed are the experimental models, primers, antibodies, chemicals, proteins, kits, softwares and advices utilized in this paper

| EXPERIMENTAL MODEL           | DESCRIPTION                                   | COMPANY                                 | CATALOG |
|------------------------------|-----------------------------------------------|-----------------------------------------|---------|
| <i>in vitro</i> primary cell | IMR-90 – normal human fetal lung fibroblast   | Coriell Institute for Medical Research  | 190-83  |
| <i>in vitro</i> cell line    | Madin-Darby canine kidney (MDCK)              | Institute of Medical Microbiology, Jena | N/A     |
| <i>in vivo</i> model         | BALB/cJRj-wild-type mice                      | Janvier Labs                            | N/A     |
| <i>ex vivo</i> model         | C57/bl6-wild type mice                        | University Hospital Jena                | N/A     |
| <i>in vitro</i> virus strain | influenza A virus/IAV/H1N1/Puerto Rico/8/1934 | Institute of Medical Microbiology, Jena | N/A     |
| <i>in vivo</i> virus strain  | influenza A virus/IAV/H1N1/vi0084/2016        | Institute of Medical Microbiology, Jena | N/A     |
| <i>ex vivo</i> virus strain  | HA-G222-mpJena/5258                           | Institute of Medical Microbiology, Jena | N/A     |

| PRIMER               | SEQUENCE FORWARD           | SEQUENCE REVERSE         |
|----------------------|----------------------------|--------------------------|
| $\beta$ -Actin mouse | ATGGAGGGGAATACAGCCC        | TTCTTTGCAGCTCCTTCGTT     |
| CDKN2A mouse         | AATCTCCGCGAGGAAAGC         | GTCTGCAGCGGACTCCAT       |
| CDKN1A mouse         | TTGCCAGCAGAATAAAAGGTG      | TTTGCTCCTGTGCGGAAC       |
| MMP3 mouse           | CGATGGACAGAGGATGTCAC       | CAGCCTTGGCTGAGTGGT       |
| Lamin B1 mouse       | GGGAAGTTTATTTTCGCTTGAAGA   | ATCTCCCAGCTCCCATT        |
| $\beta$ -Actin human | CATGTACGTTGCTATCCAGGC      | CTCCTTAATGTCACGCACGAT    |
| CDKN2A human         | GAGCAGCATGGAGCCCTTC        | CGTAACTATTCGGTGCCTTG     |
| CDKN1A human         | TCACTGTCTTGTACCCTGTGTC     | GGCGTTTGGAGTGGTAGAAA     |
| MMP3 human           | CAAAACATATTTCTTGTAGAGGACAA | TTCAGCTATTTGCTTGGGAAA    |
| Lamin B1 human       | TTGGATGCTCTTGGGGTTC        | AAGCAGCTGGAGTGGTTGTT     |
| IL-6 human           | AATTCGGTACATCCTCGACGG      | GGTTGTTTTCTGCCAGTGCC     |
| IP-10 human          | CCAGAATCGAAGGCCATCAA       | TTTCCTTGCTAACTGCTTTCAG   |
| IL-8 human           | ATGACTTCCAAGCTGGCCGTGGCT   | TCTCAGCCCTCTTCAAAAACCTCT |

| ANTIBODY                    | DESCRIPTION                                                | COMPANY                  | CATALOG     |
|-----------------------------|------------------------------------------------------------|--------------------------|-------------|
| p16                         | p16INK4a Polyclonal Antibody                               | Thermo Fisher Scientific | PA5-20379   |
| p21                         | p21 (WAF1, Cip1) Polyclonal Antibody                       | Thermo Fisher Scientific | 14-6715-81  |
| DPP4                        | CD26 Recombinant Rabbit Monoclonal Antibody (JM11-42)      | Thermo Fisher Scientific | MA5-32643   |
| phalloidin                  | BODIPY™ 558/568 Phalloidin                                 | Thermo Fisher Scientific | B3475       |
| secondary p16, p21, DPP4    | Alexa Fluor® 488 AffiniPure Donkey Anti-Rabbit IgG (H+L)   | Jackson Immuno Research  | 711-545-152 |
| isotype control             | Rabbit (DA1E) mAb IgG XP® Isotype Control                  | Cell Signaling           | 3900        |
| IAV nucleoprotein           | Anti-H1N1 Influenza A virus Nucleocapsid protein antibody  | Abcam                    | ab104870    |
| CD68                        | CD68 Monoclonal Antibody (KP1)                             | Thermo Fisher Scientific | 14-0688-82  |
| secondary IAV nucleoprotein | Alexa Fluor® 488 AffiniPure Donkey Anti-Rabbit IgG (H+L)   | Jackson Immuno Research  | 711-545-152 |
| secondary CD68              | Cy™3 AffiniPure Donkey Anti-Mouse IgG (H+L)                | Jackson Immuno Research  | 715-165-150 |
| DPP4                        | DPP4/CD26 (D6D8K) Rabbit mAb                               | Cell Signaling           | 67138S      |
| p21                         | p21 Waf1/Cip1 (12D1) Rabbit mAb                            | Cell Signaling           | 2947S       |
| $\beta$ -Actin              | Monoclonal Anti- $\beta$ -Actin antibody produced in mouse | Sigma Aldrich            | A2228-100UL |
| HRP DPP4, p21               | Goat Anti-Rabbit IgG (H+L)-HRP Conjugate                   | Biorad                   | 172-1019    |
| HRP $\beta$ -Actin          | Goat Anti-Mouse IgG (H+L)-HRP Conjugate                    | Biorad                   | 172-1011    |
| IAV nucleoprotein           | Anti-H1N1 Influenza A virus Nucleocapsid protein antibody  | Abcam                    | ab104870    |

# SUPPLEMENTARY DATA

|                                           |                                                        |                          |             |
|-------------------------------------------|--------------------------------------------------------|--------------------------|-------------|
| <b>phalloidin</b>                         | Alexa Fluor™ Plus 647 Phalloidin                       | Thermo Fisher Scientific | A30107      |
| <b>secondary IAV nucleoprotein nuclei</b> | Cy3-conjugated AffiniPure Donkey Anti-Rabbit IgG (H+L) | Jackson Immuno Research  | 711-165-152 |
|                                           | DAPI Fluoromount-G®                                    | Southern Biotech         | 0100-20     |

| CHEMICAL, PROTEIN                      | DESCRIPTION                                                   | COMPANY                  | CATALOG     |
|----------------------------------------|---------------------------------------------------------------|--------------------------|-------------|
| <b>10x MEM Agar</b>                    | MEM (10X) Minimum Essential Medium                            | Thermo Fisher Scientific | 21430020    |
| <b>Agarose</b>                         | Oxoid Purified Agar                                           | Thermo Fisher Scientific | LP0028B     |
| <b>Albumin</b>                         | Agarose (4 %)                                                 | Thermo Fisher Scientific | 18300012    |
| <b>CaCl<sub>2</sub></b>                | Albumine solution 30 %                                        | Roth                     | 9401.3      |
| <b>DAPI</b>                            | Calcium chloride                                              | Sigma Aldrich            | 746495-100G |
| <b>Dextran</b>                         | DAPI Fluoromount-G®                                           | Southern Biotech         | 0100-20     |
| <b>DMEM</b>                            | DEAE Dextran                                                  | Roth                     | 4198.2      |
| <b>DMEM/F-12</b>                       | Dulbecco's Modified Eagle's Medium                            | Sigma Aldrich            | D6429       |
| <b>DMEM/F-12 GlutaMAX</b>              | DMEM/F-12, no phenol red                                      | Thermo Fisher Scientific | 21041025    |
| <b>Doxorubicin</b>                     | DMEM/F-12, GlutaMAX™ Supplement                               | Thermo Fisher Scientific | 31331093    |
| <b>DPBS</b>                            | Doxorubicin hydrochloride                                     | TOCRIS                   | 2252        |
| <b>EMEM</b>                            | DPBS, no calcium, no magnesium                                | Thermo Fisher Scientific | 14190-169   |
| <b>FBS</b>                             | Minimum Essential Medium Eagle                                | Sigma Aldrich            | M4655-500ML |
|                                        | FBS standard, South America origin, fetal bovine serum        | Pan Biotech              | P30-3306    |
| <b>Formaldehyd</b>                     | Formaldehyd solution                                          | Sigma Aldrich            | 252549-25ML |
| <b>HEPES</b>                           | HEPES (1M)                                                    | Thermo Fisher Scientific | 15630056    |
| <b>Histopaque</b>                      | Histopaque®-1077                                              | Sigma Aldrich            | 10771-500ML |
| <b>HRP substrate</b>                   | Immobilon Western HRP-Substrate                               | Merck Millipore          | WBKLS0500   |
| <b>HSA</b>                             | Human Serum Albumin (HSA), 20 % Solution, Premium Grade       | Pan Biotech              | P06-27500   |
| <b>M1-Macrophage Generation Medium</b> | M1-Macrophage Generation Medium DXF                           | PromoCell                | C-28055     |
| <b>MgCl<sub>2</sub></b>                | Magnesium chloride                                            | Sigma Aldrich            | 8147330100  |
| <b>Monocyte Attachment Medium</b>      | Monocyte Attachment Medium                                    | PromoCell                | C-28051     |
| <b>Neutral red</b>                     | Neutral red staining                                          | Sigma Aldrich            | N4638-5G    |
| <b>Penicillin/Streptomycin</b>         | Penicillin-Streptomycin Mixture                               | Lonza                    | DE17-602E   |
| <b>PVDF</b>                            | PVDF Transfer Membrane                                        | Thermo Fisher Scientific | 88518       |
| <b>RIPA buffer</b>                     | RIPA-Lyse- und Extraktionspuffer                              | Thermo Fisher Scientific | 89900       |
| <b>RPMI</b>                            | RPMI 1640 Medium, GlutaMAX™ Supplement                        | Thermo Fisher Scientific | 61870044    |
| <b>TNF-alpha human</b>                 | Human TNF-alpha Recombinant Protein                           | Thermo Fisher Scientific | PHC3011     |
| <b>TNF-alpha murine</b>                | Recombinant murine Tumor Necrosis Factor-alpha (rm TNF-alpha) | ImmunoTools              | 12343016    |
| <b>Triton X</b>                        | Triton X 100                                                  | Roth                     | 3051.2      |
| <b>Trypsin</b>                         | Trypsin, TPCK Treated                                         | Thermo Fisher Scientific | 20233       |

|                                                                                 | COMPANY                  | CATALOG |
|---------------------------------------------------------------------------------|--------------------------|---------|
| <b>KIT</b>                                                                      |                          |         |
| <b>CyQUANT™ LDH Cytotoxicity Assay</b>                                          | Thermo Fisher Scientific | C20300  |
| <b>High-Capacity cDNA Reverse Transcription Kit</b>                             | Thermo Fisher Scientific | 4368813 |
| <b>LEGENDplex™ Human Inflammation Panel 1 (13-plex) with Filter Plate</b>       | Biolegend                | 740808  |
| <b>LEGENDplex™ Human Macrophage/Microglia Panel (13-plex) with Filter Plate</b> | Biolegend                | 740502  |
| <b>LEGENDplex™ Mouse Anti-Virus Response Panel (13plex) with Filter Plate</b>   | Biolegend                | 740621  |
| <b>Maxima SYBR Green qPCR Master Mix (2X), with separate ROX vial</b>           | Thermo Fisher Scientific | K0253   |
| <b>Pierce™ BCA Protein Assay Kit</b>                                            | Thermo Fisher Scientific | 23227   |
| <b>RNeasy Mini QIAcube Kit (240)</b>                                            | Qiagen                   | 74116   |
| <b>RNeasy Plus Micro Kit</b>                                                    | Qiagen                   | 74034   |
| <b>Senescence Detection Kit</b>                                                 | Biovision                | K320    |

| SOFTWARE                                           | COMPANY   | SOURCE                                                              |
|----------------------------------------------------|-----------|---------------------------------------------------------------------|
| <b>Biorender</b>                                   | Biorender | <a href="https://biorender.com/">https://biorender.com/</a>         |
| <b>GraphPad Prism Version 9</b>                    | Graphpad  | <a href="https://www.graphpad.com/">https://www.graphpad.com/</a>   |
| <b>Legendplex Data Analysis Software Version 8</b> | biolegend | <a href="https://www.biolegend.com/">https://www.biolegend.com/</a> |

# SUPPLEMENTARY DATA

|                             |                                        |                                                                     |
|-----------------------------|----------------------------------------|---------------------------------------------------------------------|
| <b>R</b>                    | R Foundation for Statistical Computing | <a href="https://www.R-project.org/">https://www.R-project.org/</a> |
| <b>ZEN 2 (blue edition)</b> | Carl Zeiss                             | <a href="https://www.zeiss.com/">https://www.zeiss.com/</a>         |

| <b>ADVICE</b>                             | <b>DESCRIPTION</b>        | <b>COMPANY</b>           |
|-------------------------------------------|---------------------------|--------------------------|
| <b>Accuri C6 Plus Cytometer</b>           | flow cytometer            | BD Biosciences           |
| <b>AxioObserver Z.1+Apotome 2</b>         | microscope                | Zeiss                    |
| <b>FusionFX</b>                           | chemiluminescence imaging | Vilber                   |
| <b>Leica CM1950</b>                       | cryostat                  | Leica                    |
| <b>Leica VT1200 S</b>                     | vibratome                 | Leica                    |
| <b>NanoDrop spectrophotometer ND-1000</b> | spectrophotometer         | Peqlab/VWR               |
| <b>Qubit 4</b>                            | fluorometer               | Thermo Fisher Scientific |
